# Supplementary material
Source: MDPI journal article supplement (https://www.mdpi.com/2072-4292/15/4/1077)
Supplement: s1 [file s1]

## Supplementary Materials

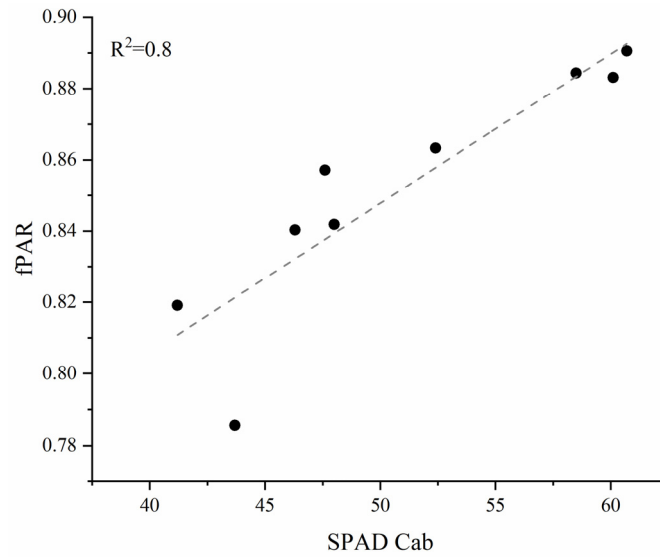

**Figure S1.** Relationship between chlorophyll content (Cab) measured by SPAD-502 and fPAR estimated using leaf absorption.

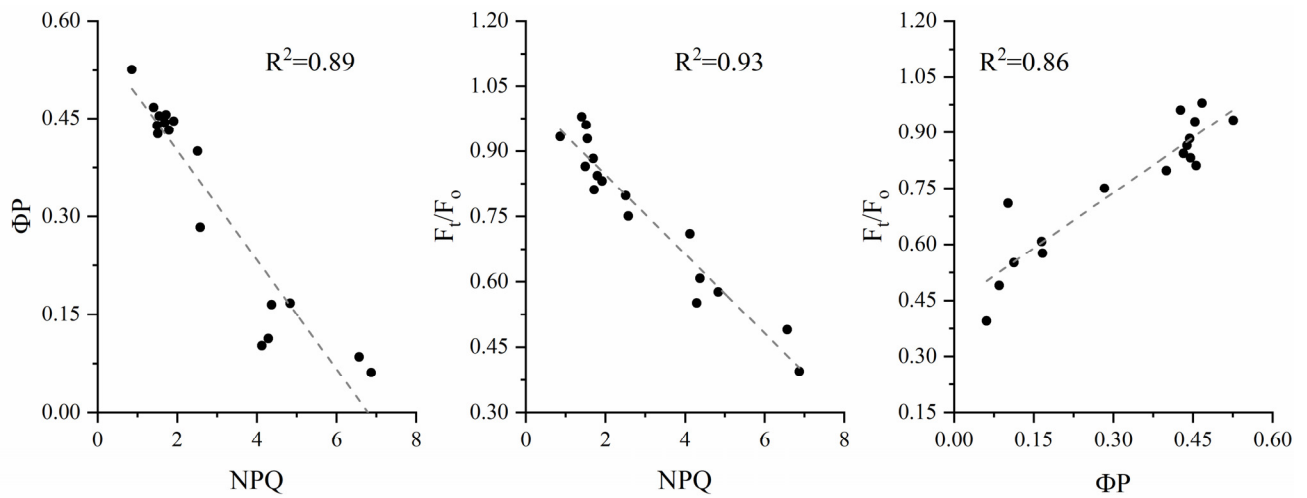

**Figure S2.** Relationships between nonphotochemical quenching (NPQ) and operating quantum yield of photochemistry in PSII ( $\Phi P$ ), steady-state active fluorescence ( $F_t$ ) normalized by dark acclimation minimal fluorescence ( $F_0$ ).

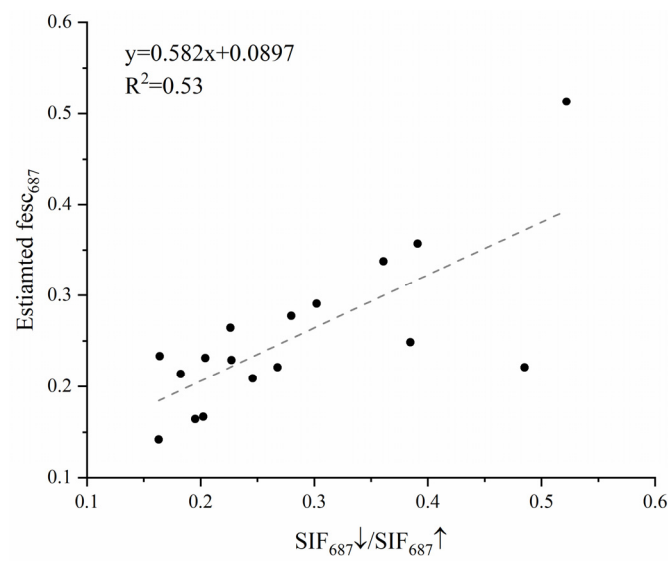

**Figure S3.** Relationships between the ratio of downward SIF and upward SIF at 687 nm and the estimated escape probability at 687 nm.
